## **Lynx1 modulates the activity of nAChRs to slow NMJ and muscle fiber degeneration during aging**

Sydney V. Doss, Sébastien Barbat-Artigas, Tracey Myers, Bhola Shankar Pradhan, Tomasz J. Prószyński, Richard Robitaille, Gregorio Valdez

The authors have withdrawn their manuscript to revisit some of the data, interpretations and conclusions. Therefore, the authors do not wish this work to be cited as a reference. If you have any questions, please contact the corresponding author.
